# Supplementary material for: Analysis of biophysical and anthropogenic variables and their relation to the regional spatial variation of aboveground biomass illustrated for North and East Kalimantan, Borneo
Source: Springer Nature journal article supplement (doi:10.1186/s13021-014-0008-z), 2014-09-18
Supplement: 13021_2014_8_MOESM1_ESM.pdf [file 13021_2014_8_MOESM1_ESM.pdf]

## SUPPORTING INFORMATION

### Appendix S1 Frequency distribution of aboveground biomass in the sample

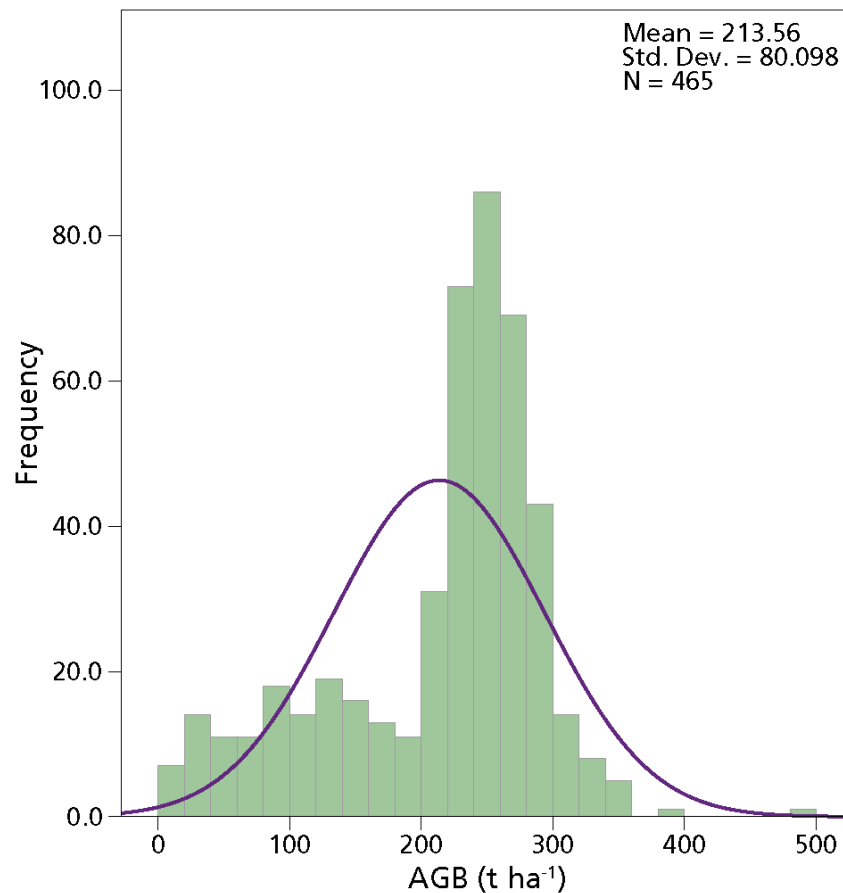

**Figure S1.** Frequency distribution of aboveground biomass (AGB,  $\text{t ha}^{-1}$ ) (bars) in the randomly selected sample of 465 data points in East and North Kalimantan. The line shows a normal distribution.

### Appendix S2 Descriptive statistics of the data

**Table S2.** Descriptive statistics showing the mean, standard deviation and 95% confidence interval for AGB and the continuous variables in the sample

|                            | Mean     | Standard<br>Deviation | 95% Confidence Interval |          |
|----------------------------|----------|-----------------------|-------------------------|----------|
|                            |          |                       | Lower                   | Upper    |
| AGB ( $\text{t ha}^{-1}$ ) | 213.6    | 80.1                  | 206.4                   | 220.2    |
| Altitude (m)               | 367.3    | 396.5                 | 333.7                   | 401.3    |
| Slope (%)                  | 10.3     | 8.8                   | 9.5                     | 11.1     |
| Distance to the nearest    |          |                       |                         |          |
| Fire (m)                   | 8248.9   | 9658.3                | 7408.3                  | 9061.4   |
| Road (m)                   | 6385.2   | 9584.2                | 5579.6                  | 7221.3   |
| River (m)                  | 11352.0  | 10449.6               | 10407.7                 | 12381.5  |
| City (m)                   | 127479.2 | 75899.7               | 120507.3                | 134074.6 |

### Appendix S3 Correlation matrix for the combination of all continuous variables

**Table S3.** Correlation matrix showing Pearson’s correlation coefficients ( $P < 0.001$ ) for the combination of all the continuous variables (ln, logarithmically transformed).

|                           | AGB (t ha <sup>-1</sup> ) | Altitude (ln) | Slope (ln) | Distance to the nearest |           |            |           |
|---------------------------|---------------------------|---------------|------------|-------------------------|-----------|------------|-----------|
|                           |                           |               |            | Fire (ln)               | Road (ln) | River (ln) | City (ln) |
| AGB (t ha <sup>-1</sup> ) | 1                         |               |            |                         |           |            |           |
| Altitude (ln)             | 0.740                     | 1             |            |                         |           |            |           |
| Slope (ln)                | 0.563                     | 0.745         | 1          |                         |           |            |           |
| Distance to the nearest   |                           |               |            |                         |           |            |           |
| Fire (ln)                 | 0.607                     | 0.696         | 0.492      | 1                       |           |            |           |
| Road (ln)                 | 0.369                     | 0.460         | 0.322      | 0.439                   | 1         |            |           |
| River (ln)                | 0.301                     | 0.383         | 0.182      | 0.268                   | 0.103     | 1          |           |
| City (ln)                 | 0.478                     | 0.623         | 0.422      | 0.390                   | 0.436     | 0.129      | 1         |

### Appendix S4 Interaction effects between altitude and land allocation zoning

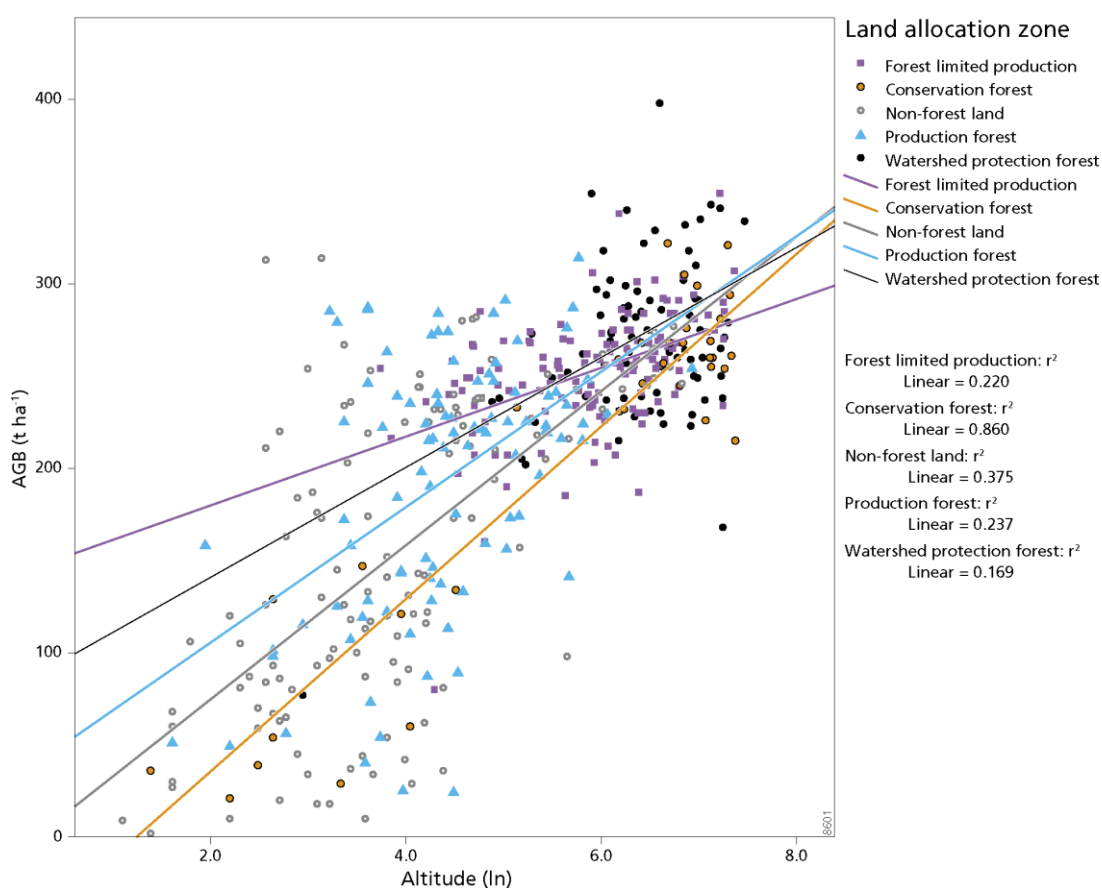

**Figure S4:** Interaction effect between altitude and the land allocation zones in the multiple regression.

**Appendix S5 Frequency distribution, PP plot and QQ plot of the standardised residuals of the multiple linear regression**

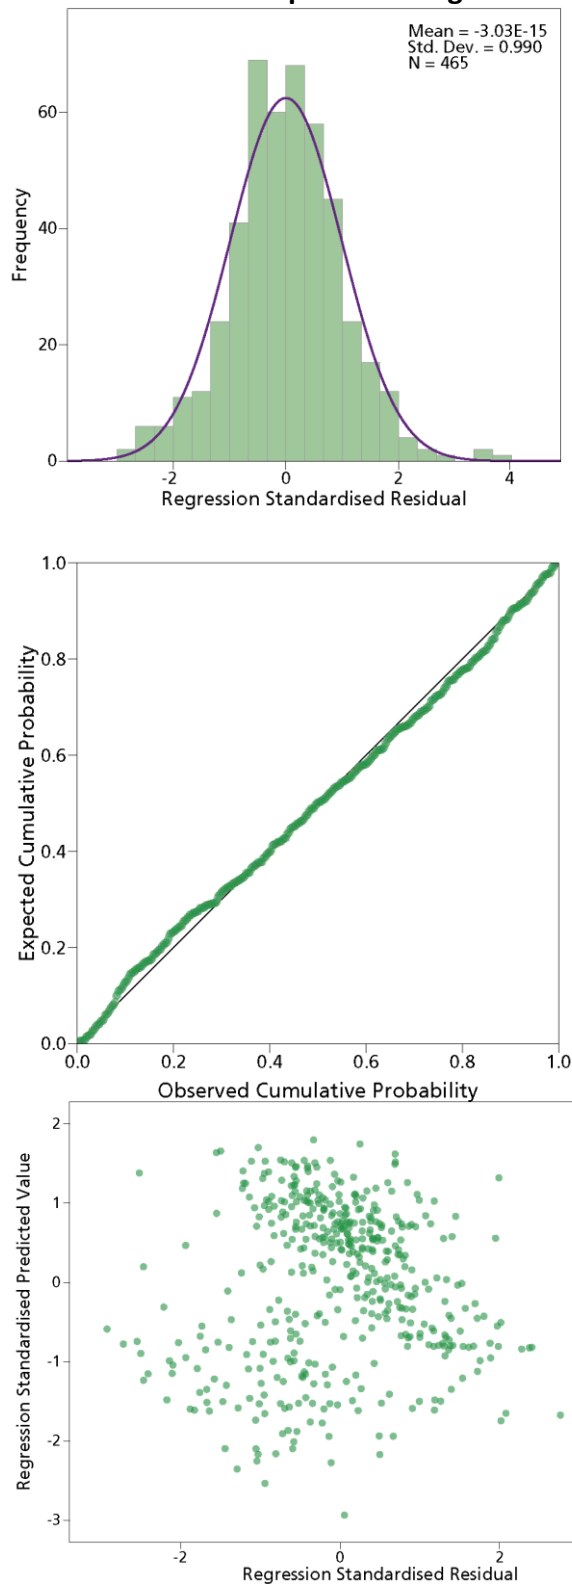

**Figure S5** Frequency distribution (a), PP plot (b) and QQ plot (c) of the standardised residuals that resulted from the non-spatial multiple regression model. The lines show a normal distribution.

## Appendix S6 Frequency distribution of the standardised residuals of the GWR

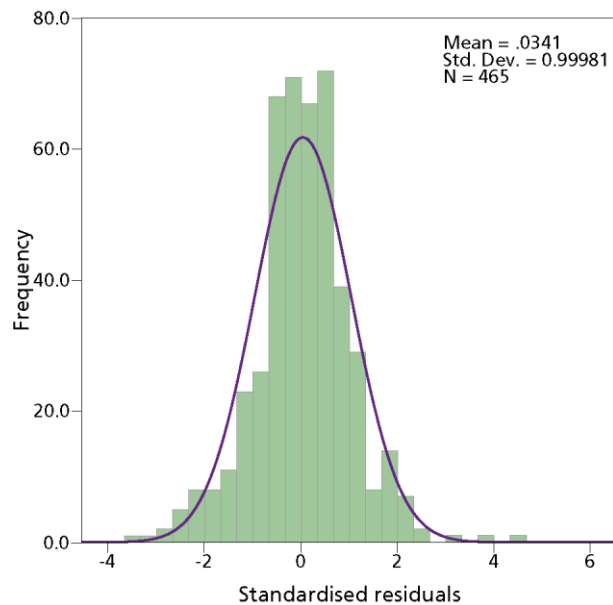

**Figure S6.** Frequency distribution of the standardised residuals that resulted from the spatial GWR model. The line shows a normal distribution.

## Appendix S7 Overview of the variables and the data selected

**Table S7.** Overview of the variables and the data selected.

| <i>Data layer (proxy)</i>   | <i>Year (resolution)</i> | <i>Quality data</i> | <i>Data and source</i>                                                                                                                      |
|-----------------------------|--------------------------|---------------------|---------------------------------------------------------------------------------------------------------------------------------------------|
| AGB ( $t\ ha^{-1}$ )        | 2008                     | 50m                 | AGB map (Quiñones <i>et al.</i> , 2011)                                                                                                     |
| Altitude (m)                | 2012                     | 90 m                | SRTM-DEM NASA (NASA, 2012)                                                                                                                  |
| Slope (%)                   | 2012                     | 90 m                | SRTM-DEM NASA (NASA, 2012)                                                                                                                  |
| Soil type                   | 1999                     | Polygon             | Geo-corrected and gap filled reproduction of 1:250,000 RePPProT land systems map (Consortium to Revise the HCV Toolkit for Indonesia, 2008) |
| Land allocation             | 2009                     | Polygon             | (Ministry of Forestry Indonesia, year unknown)                                                                                              |
| Distance to the nearest (m) |                          |                     |                                                                                                                                             |
| Fire                        | 2000-2008                | MODIS Point         | (NASA/LANCE – FIRMS, 2011)                                                                                                                  |
| Road                        | 2003                     | Polyline            | Developed by Bakosurtanal; prepared by WRI for the Interactive Atlas for Indonesia's Forests (Bakosurtanal, 2009)                           |
| River                       | 2009                     | Polyline            | Idem (Bakosurtanal, 2009)                                                                                                                   |
| City                        | 2012                     | Point               | (CIESIN, 2012)                                                                                                                              |

## **Appendix S8 Data sources**

### **Aboveground biomass**

Quiñones, M.J., Schut, V., Wielaard, N. & Hoekman, D. (2011) Above Ground Biomass map Kalimantan 2008 - Final report. *SarVision Wageningen*, 34p.

### **Altitude and slope**

NASA, 2012. SRTM-DEM (<http://www2.jpl.nasa.gov/srtm/>)

### **Soil type**

Consortium to Revise the HCV Toolkit for Indonesia (2008) Toolkit for identification of high conservation values in Indonesia. Jakarta, Indonesia. Digital Appendix 12. Ecosystem proxy shapefiles for Kalimantan ver 1.0.

### **Land allocation**

Ministry of Forestry Indonesia (year unknown). Kawasan Hutan (Forest estate) land use maps, General Direktorat of Planning, Ministry of Forestry; downloaded from <http://appgis.dephut.go.id/appgis/kml.aspx>. Processed and provided by Greenpeace. Prepared by the World Resources Institute (2012). Downloaded from <http://www.wri.org/applications/maps/forest-cover-analyzer/>

### **Fire**

NASA/LANCE – FIRMS, 2011. MODIS Hotspot / Active Fire Detections. Data set. Acquired on 17-09-2012 online <http://earthdata.nasa.gov/data/nrtdata/firms>

### **Main cities**

CIESIN, 2012 (Center for International Earth Science Information Network), Columbia University; International Food Policy Research Institute (IPFRI); The World Bank; Centro Internacional de Agricultura Tropical (CIAT): <http://sedac.ciesin.columbia.edu/gpw/>

### **Main roads and rivers**

Bakosurtanal, 2009. Bakosurtanal, the Indonesian National Coordinating Agency for Surveys and Mapping (<http://www.bakosurtanal.go.id>). Data available in Minnemeyer et al. (2009). Interactive Atlas of Indonesia's Forests CD-ROM. Washington, DC: World Resources Institute. Prepared by the World Resources Institute (2012).

## Appendix S9 Categorisation of the variables

### Categorisation of altitude

|           |             |
|-----------|-------------|
| Lowlands  | 0 – 750m    |
| Midlands  | 750 – 1500m |
| Highlands | > 1500m     |

### Classification of soil type

|           |                                                                                                                    |
|-----------|--------------------------------------------------------------------------------------------------------------------|
| New class | Original classes (Symbol_LS)                                                                                       |
| Karst:    | GBJ, KPR, OKI                                                                                                      |
| Peat:     | BRH, GBT, KLR, MDW                                                                                                 |
| Volcanic: | BTA, BTK, LPN, SMD, TBA                                                                                            |
| Other:    | BKN, BLI, BPD, BRW, GDG, HJA, JLH, KHY,<br>KJP, LHI, LNG, LWW, MGH, MPT, MTL,<br>PDH, PKU, PMG, PST, PTG, RGK, SBG |

### Categorisation of fire into burned and non-burned areas

|          |                |
|----------|----------------|
| burned   | ≤ 500m hotspot |
| unburned | > 500m hotspot |

## References

- Bakosurtanal (2009) Bakosurtanal , the Indonesian National Coordinating Agency for Surveys and Mapping (<http://www.bakosurtanal.go.id>). Data available in Minnemeyer et al. (2009). Interactive Atlas of Indonesia's Forests CD-ROM. Washington, DC: World Resources Institute. Pre.
- CIESIN (2012) Center for International Earth Science Information Network, Columbia University; International Food Policy Research Institute (IPFRI); The World Bank; Centro Internacional de Agricultura Tropical (CIAT): <http://sedac.ciesin.columbia.edu/gpw/>.
- Consortium to Revise the HCV Toolkit for Indonesia (2008) Toolkit for identification of high conservation values in Indonesia. Jakarta, Indonesia. Digital Appendix 12. Ecosystem proxy shapefiles for Kalimantan ver 1.0.
- Ministry of Forestry Indonesia (year unknown) Kawasan Hutan (Forest estate) land use maps, General Direktorat of Planning, Ministry of Forestry; downloaded from <http://appgis.dephut.go.id/appgis/kml.aspx>. Processed and provided by Greenpeace. Prepared by the World Resources Institute (2012).
- NASA (2012) <http://www2.jpl.nasa.gov/srtm/>.
- NASA/LANCE – FIRMS (2011) MODIS Hotspot / Active Fire Detections. Data set. Acquired on 17-09-2012 online <http://earthdata.nasa.gov/data/nrtdata/firms>.
- Quiñones, M.J., Schut, V., Wielaard, N. & Hoekman, D. (2011) Above Ground Biomass map Kalimantan 2008 - Final report. *SarVision Wageningen*, 34.
